# Supplementary material
Source: PubMed Central journal article supplement (PMC8716316)
Supplement: NIHMS1755709-supplement-Supp_File.pdf [file NIHMS1755709-supplement-Supp_File.pdf]

# Supporting Information for Site-level bioactivity of small-molecules from deep-learned representations of quantum chemistry

Kathryn Sarullo<sup>†</sup>, Matthew K. Matlock<sup>†</sup> and S. Joshua Swamidass\*

*Washington University in St. Louis, School of Medicine, Department of Pathology and  
Immunology, Saint Louis, MO, USA*

E-mail: swamidass@wustl.edu

## List of Figures

|           |                       |    |
|-----------|-----------------------|----|
| Figure S1 | AUCs . . . . .        | S3 |
| Figure S2 | Reliability . . . . . | S4 |

## List of Tables

|          |                                                                               |    |
|----------|-------------------------------------------------------------------------------|----|
| Table S1 | Quantum domains used to train transfer models . . . . .                       | S2 |
| Table S2 | Top-2 accuracy performance of alternate topological representations . . . . . | S3 |
| Table S3 | Top-2 accuracy performance of alternate QC representations . . . . .          | S4 |
| Table S4 | Accuracy vs state size . . . . .                                              | S5 |

---

<sup>†</sup>Authors contributed equally to this paper.

**Table S1: Quantum domains used to train transfer models.** For each domain, a graph-based deep learning model was trained to predict a selected subset of the available quantum chemical properties. Graph-based encodings were extracted from each trained model for each molecule and used for transfer learning. TE: total energy, HOMO: highest occupied molecular orbital, LUMO: lowest unoccupied molecular orbital, Gap: HOMO-LUMO gap energy, Tot: total valence, Bond: bonded valence, Chrg: Mulliken charge, Pop: Mulliken population, Order: Mayer bond order, Length: bond length

| D  | Molecule         |      |     | Atom    |      |          |     | Bond  |        |
|----|------------------|------|-----|---------|------|----------|-----|-------|--------|
|    | Orbital Energies |      |     | Valence |      | Mulliken |     | Order | Length |
|    | TE               | HOMO | Gap | Tot     | Bond | Chrg     | Pop |       |        |
| 1  |                  |      |     |         |      |          |     | y     | y      |
| 2  |                  |      |     | y       | y    | y        | y   |       |        |
| 3  |                  |      |     | y       | y    | y        | y   | y     | y      |
| 4  |                  | y    | y   |         |      |          |     |       |        |
| 5  |                  | y    | y   |         |      |          |     | y     | y      |
| 6  |                  | y    | y   | y       | y    | y        | y   |       |        |
| 7  |                  | y    | y   | y       | y    | y        | y   | y     | y      |
| 8  | y                |      |     |         |      |          |     |       |        |
| 9  | y                |      |     |         |      |          |     | y     | y      |
| 10 | y                |      |     | y       | y    | y        | y   |       |        |
| 11 | y                |      |     | y       | y    | y        | y   | y     | y      |
| 12 | y                | y    | y   |         |      |          |     |       |        |
| 13 | y                | y    | y   |         |      |          |     | y     | y      |
| 14 | y                | y    | y   | y       | y    | y        | y   |       |        |
| QC | y                | y    | y   | y       | y    | y        | y   | y     | y      |

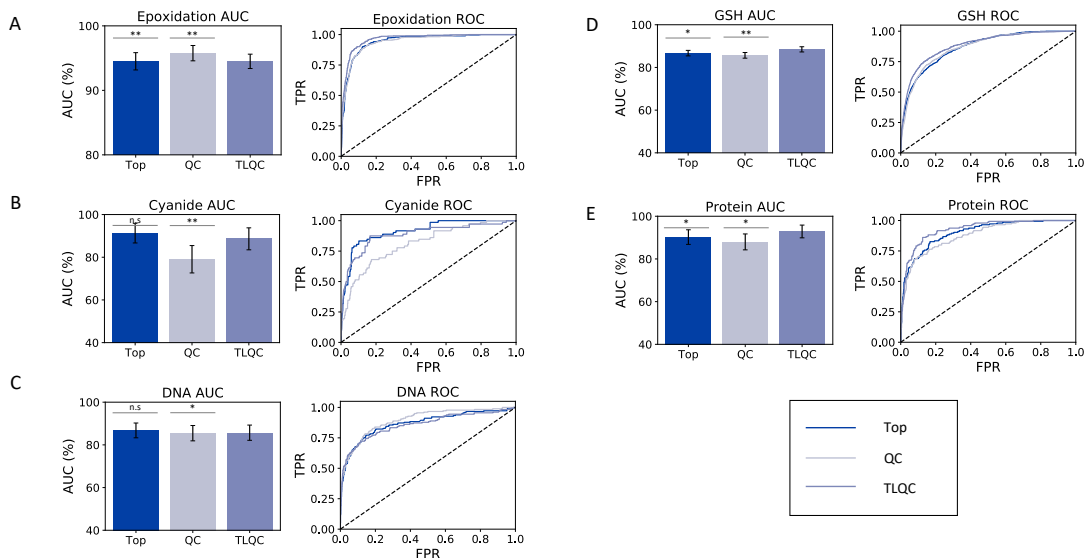

**Figure S1: AUCs** We computed task specific (Epoxidation, Cyanide, DNA, GSH, and Protein) AUC values and ROC curves for each model (Top, QC, and TLQC). \* $p$ -value < 0.05, \*\* $p$ -value < 0.001

**Table S2: Top-2 accuracy performance of alternate topological representations** We varied the architectures for the Top model. We chose the highest top-2 accuracy on average as a comparison for the TLQC model. The highest top-2 accuracy for the Top model was Top N3.

| Architecture | Epoxidation  | Cyanide      | DNA          | GSH          | Protein      | Average      |
|--------------|--------------|--------------|--------------|--------------|--------------|--------------|
| N2           | 78.7%        | 78.4%        | 76.3%        | 58.0%        | 70.7%        | 66.1%        |
| <b>N3</b>    | <b>81.1%</b> | <b>62.7%</b> | <b>77.7%</b> | <b>65.4%</b> | <b>79.6%</b> | <b>71.1%</b> |
| N4           | 75.7%        | 68.6%        | 74.3%        | 62.1%        | 79.6%        | 67.8%        |
| N5           | 77.3%        | 64.7%        | 76.3%        | 63.5%        | 75.2%        | 68.7%        |

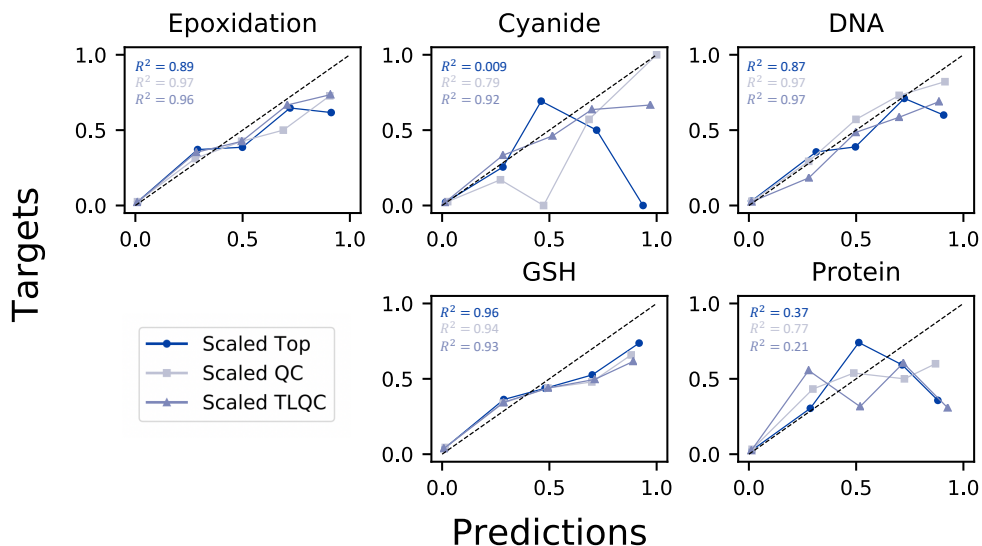

**Figure S2: Reliability** We performed platt scaling on the each of the task specific (Epoxidation, Cyanide, DNA, GSH, and Protein) predictions for each model (Top, QC, and TLQC) to get the scaled predictions. The reliability plots tell us if each tasks predictions are trustworthy. A perfect predictor would be aligned with the linear, black dashed line on each plot.

**Table S3: Top-2 accuracy performance of alternate QC representations** We varied the architectures for the QC model. We chose the highest top-2 accuracy on average as a comparison for the TLQC model. The highest top-2 accuracy for the QC model was QC N5.

| Architecure | Epoxidation  | Cyanide      | DNA          | GSH          | Protein      | Average      |
|-------------|--------------|--------------|--------------|--------------|--------------|--------------|
| N2          | 78.9%        | 45.0%        | 68.0%        | 56.9%        | 76.9%        | 64.1%        |
| N3          | 81.9%        | 56.8%        | 70.1%        | 55.8%        | 73.4%        | 64.6%        |
| N4          | 81.4%        | 49.0%        | 69.4%        | 57.8%        | 73.4%        | 65.3%        |
| <b>N5</b>   | <b>79.2%</b> | <b>56.8%</b> | <b>74.3%</b> | <b>58.7%</b> | <b>70.7%</b> | <b>65.7%</b> |

**Table S4: Accuracy vs state size** We trained several models to predict QC properties with decreasing state sizes; 32,48,64,96, and 128. Here we show the absolute error between the state size and each of the 9 QC properties we predicted. To minimize the number of parameters of TLQC models, used 64 as the state size of the quantum representation.

| State Sizes | Molecule     |                  |              | Atom         |              |              |              | Bond         |              |
|-------------|--------------|------------------|--------------|--------------|--------------|--------------|--------------|--------------|--------------|
|             | TE           | Orbital Energies |              | Valence      |              | Mulliken     |              | Order        | Length       |
|             |              | HOMO             | Gap          | Tot          | Bond         | Chrg         | Pop          |              |              |
| 32          | 0.011        | 0.015            | 0.017        | 0.011        | 0.015        | 0.013        | 0.012        | 0.012        | 0.004        |
| 48          | 0.009        | 0.011            | 0.013        | 0.010        | 0.012        | 0.010        | 0.010        | 0.010        | 0.004        |
| <b>64</b>   | <b>0.007</b> | <b>0.010</b>     | <b>0.011</b> | <b>0.010</b> | <b>0.012</b> | <b>0.010</b> | <b>0.010</b> | <b>0.010</b> | <b>0.003</b> |
| 96          | 0.006        | 0.009            | 0.010        | 0.009        | 0.010        | 0.009        | 0.009        | 0.009        | 0.003        |
| 128         | 0.006        | 0.008            | 0.010        | 0.009        | 0.010        | 0.009        | 0.009        | 0.009        | 0.003        |
